# Supplementary material for: The draft genome of a socially polymorphic halictid bee, Lasioglossum albipes
Source: PubMed Central journal article supplement (PMC4062844; doi:10.1186/gb-2013-14-12-r142), 2013-12-20
Supplement: gb-2013-14-12-r142-S13.pdf [file gb-2013-14-12-r142-S13.pdf]

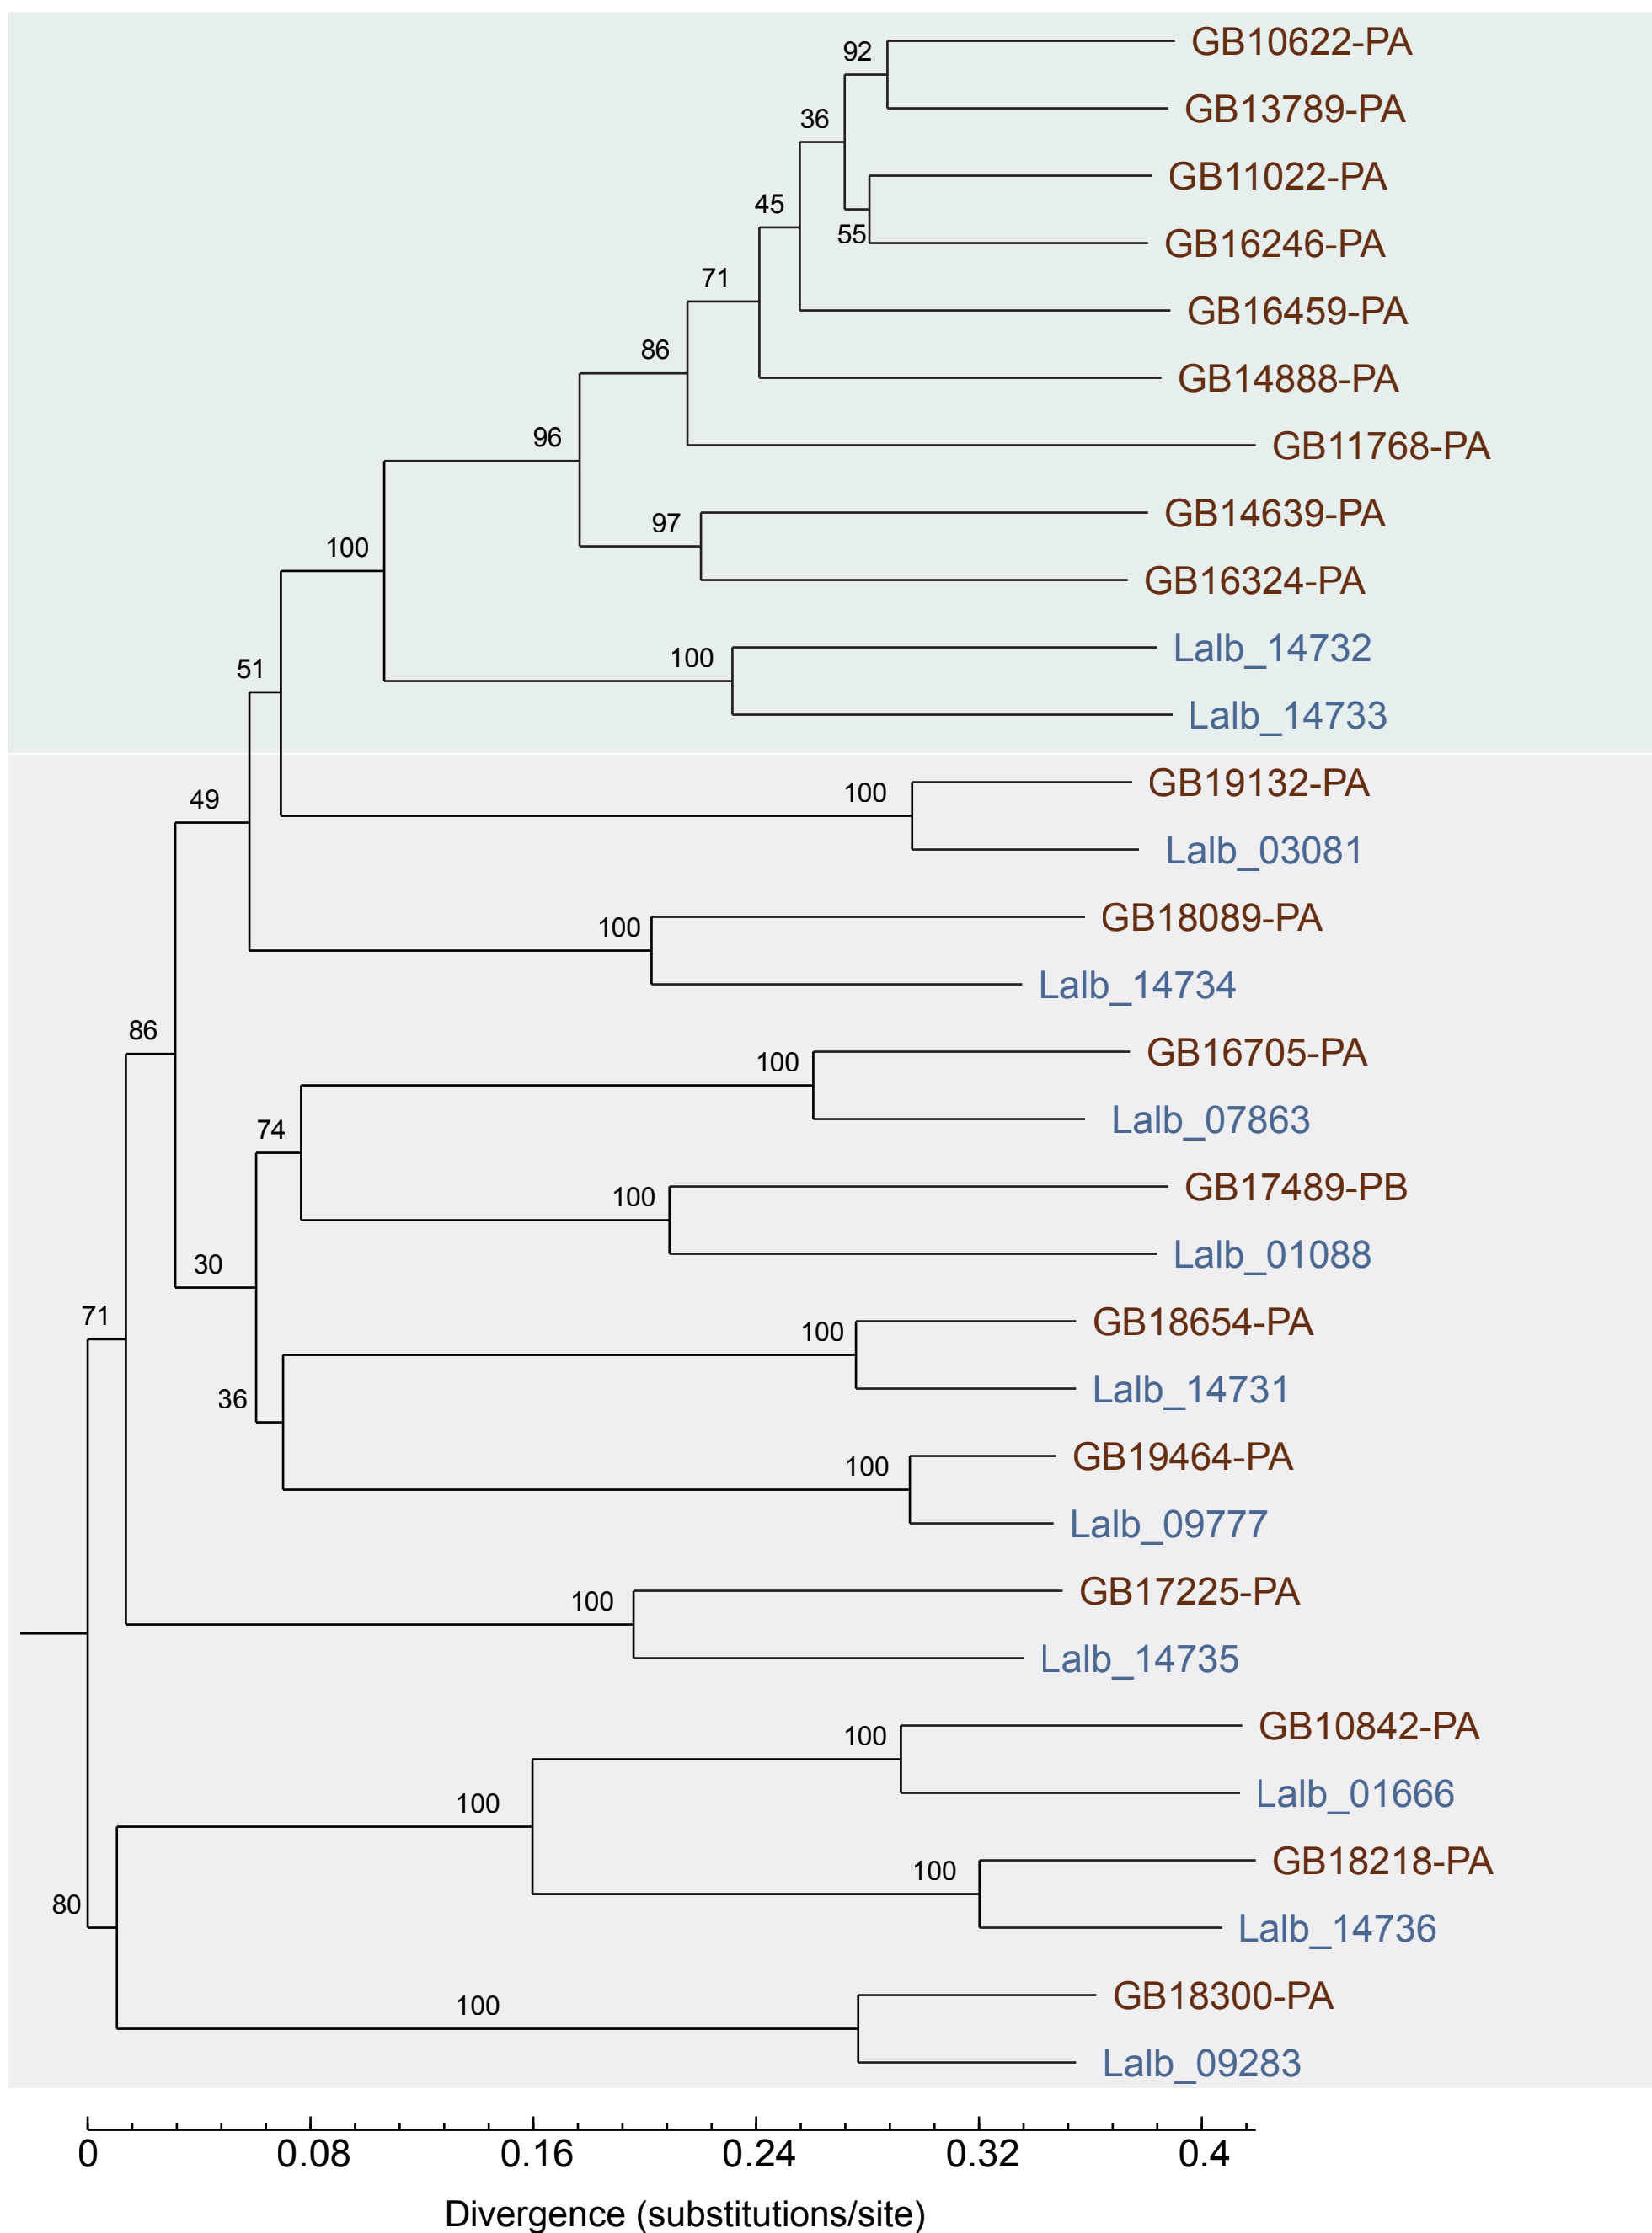

Figure S12
